# Global Bee Decline

Eduardo E. Zattara\*, Marcelo A. Aizen

Grupo de Ecología de la Polinización, INIBIOMA, Universidad Nacional del Comahue-  
CONICET, Quintral 1250, Bariloche (8400), Argentina.

\*Correspondence to: [ezattara@comahue-conicet.gob.ar](mailto:ezattara@comahue-conicet.gob.ar)

## One Sentence Summary

Analysis of multi-decadal GBIF occurrence records shows a steep decrease in the  
diversity of bees being collected worldwide.

## Abstract

Wild and managed bees are key pollinators, providing ecosystem services to a large  
fraction of the world's flowering plants, including ~85% of all cultivated crops. Recent  
reports of wild bee decline and its potential consequences are thus worrisome. However,  
evidence is mostly based on local or regional studies; global status of bee decline has not  
been assessed yet. To fill this gap, we analyzed publicly available worldwide occurrence  
records from the Global Biodiversity Information Facility spanning more than a century of  
specimen collection. We found a steep decreasing trend in the number of collected bee  
species occurring since the 1990's, which today is half from that found in the 1950's. These  
trends are alarming and encourage swift action to avoid further decline of these key  
pollinators.

## 23 Introduction

24 Insects are the most specious group of animals and are estimated to encompass a large  
25 fraction of the Earth's living biomass. Given their historical abundance and ubiquity, along  
26 with the many familiar examples of extreme resilience to natural or intentional extermination,  
27 some insects have been traditionally viewed as the ultimate survivors of most apocalyptic  
28 scenarios. However, in the last two decades, a series of high-profile reports based mostly on  
29 local or regional evidence have repeatedly warned of a significant decline in insect diversity  
30 and biomass and raised the alarm about the potential consequence of this decline for the  
31 delivery of many ecosystem services. Among affected ecosystem services is plant pollination:  
32 insects are the main vectors for pollen transfer of most wild and crop flowering plant species  
33 (1–4). Bees (Hymenoptera: Apoidea: Anthophila), a lineage that includes about 20,000  
34 described species, are the most important group of insect pollinators (5, 6). Wild bee species  
35 are not only key to sexual reproduction of hundreds of thousands of wild plant species (7),  
36 but also to the yield of about 85% of all cultivated crops (4, 8). There is mounting evidence  
37 that a decline in wild bee populations might follow or even be more pronounced than overall  
38 trends of insect decline (6, 9, 10). Such differential vulnerability might result from a high  
39 dependence of bees on flowers for food and a diversity of substrates for nesting, resources  
40 that are greatly affected by land conversion to large-scale agriculture, massive urbanization,  
41 and other intensive land uses (11–13). However, most studies on “bee decline” to date are  
42 based on local-, regional- or country-level datasets, and have a strong bias towards the  
43 Northern Hemisphere, particularly North America and Europe, where most long-term  
44 research projects capable of generating multidecadal datasets have been conducted (3, 6, 14).

45 To find an alternative approach to assess whether bee decline is a global phenomenon, we  
46 resorted to the data publicly available at the Global Biodiversity Information Facility  
47 (GBIF)(15). The GBIF collects and provides “data about all types of life on Earth” from

48 “sources including everything from museum specimens collected in the 18th and 19th century  
49 to geotagged smartphone photos shared by amateur naturalists in recent days and weeks”(15).  
50 Even though these sources are highly heterogeneous in time and space, we reasoned that if  
51 bees are experiencing a global decline in the last few decades, then a generalized decrease in  
52 population size and range would result in increased rarity, diminished chance of observation  
53 and collection and consequently, a diminished number of total species being observed and  
54 recorded worldwide each year.

## 55 Results and Discussion

56 To test our hypothesis of global bee decline, we queried GBIF for all occurrence records  
57 of Hymenoptera with a “Preserved specimen” basis of record (16) (see Methods section  
58 below). Records of preserved specimens originate in vouchered collections such as those  
59 from museums and universities, or associated with biodiversity surveys and molecular  
60 barcoding initiatives, among others. These records are likely to represent the most  
61 taxonomically trustable source of information within the GBIF dataset. We initially filtered  
62 the dataset to six families of the superfamily Apoidea that conform the Anthophila or “true  
63 bees”: Melittidae, Andrenidae, Halictidae, Colletidae, Megachilidae and Apidae (we  
64 excluded the small family Stenotritidae from our analysis, since it has only about 21 species  
65 and is restricted to Australia) (5).

66 A plot of the total number of records and the total number of species reported worldwide  
67 each year since 1920 to the present depicts an increasing trend in the number of collected  
68 specimens, but a drastic decline in the number of recorded species starting near the end of the  
69 20th century (Fig. 1A). To remove potential biases introduced by year-to-year heterogeneity  
70 of data sources, we grouped the data by decade (starting from the 1950’s, when the number of  
71 species seems to reach a plateau) and used rarefaction based interpolation/extrapolation

72 curves (iNEXT) and asymptotic richness estimators (17, 18) to compare decadal changes in  
73 richness of species records. In this analysis, accumulation curves are very similar from the  
74 1950's to the 1990's but flatten considerably to reach lower asymptotes for the 2000's and  
75 2010's (Fig. 1B), implying that the number of species among bee specimens collected  
76 worldwide is showing a sharp decline. More specifically, asymptotic richness estimators  
77 show that on average global species richness of bee records has halved since the 1950s (Fig.  
78 1C).

79 While the number of records shows an overall upward trend, we noticed a drop in the last  
80 half of the 2010's (Fig. 1A), perhaps due to publication and data incorporation lags, that  
81 could potentially cause a downward bias in our estimates. We thus complemented our  
82 working dataset with GBIF records with a "human observation" basis (19). These records  
83 have shown an exponential increase since the 1980's, in large part due to implementation of  
84 citizen science programs (Fig. S1). Consequently, adding these records to our initial dataset  
85 greatly boosted the number of total records during the more recent decades. Despite the  
86 increased sample size and the tendency of citizen-science programs to over-report rare  
87 species relative to common ones (20, 21), we still recovered the same declining trend in  
88 richness of species records (Fig. S2). Thus, we conclude that the observed decline in number  
89 of recorded bee species is not an artifact of varying sample sizes.

90 To rule out the possibility that the method we used to estimate richness does not correlate  
91 with actual bee diversity, we compared the asymptotic estimators of total richness for each  
92 family based on GBIF records with the total known number of species and found a consistent  
93 linear correlation between both pairs of values (Fig. S3). Another potential artifact causing a  
94 decline in recorded bee diversity could be an increasing loss in taxonomic expertise (22–24).  
95 However, under a scenario of increasing taxonomic uncertainty, the fraction of records  
96 unidentified to the species level (a reasonable proxy for lack of expertise) should have stayed

97 approximately constant but increased noticeably in the last two decades. While the fraction of  
98 records missing species identification shows an overall increase in the last 120 years, this  
99 trend has actually reversed since the 2000's (Fig. S4). Therefore, potential loss of taxonomic  
100 expertise cannot explain the strong decline in bee record diversity seen at the last two  
101 decades.

102 Bee families in our dataset are heterogeneous in term of richness and abundance, and the  
103 observed trends might be driven by just a few bee clades. To make a more phylogenetically-  
104 explicit analysis exploring whether bees show a differential temporal trend compared to their  
105 closest relatives, and whether particular bee families are more endangered than others, we re-  
106 analyzed the initial dataset, this time retaining also records for two families of carnivorous  
107 apoid wasps, Crabronidae and Sphecidae, that are sister to Anthophila, and for another highly  
108 diverse, non-apoid hymenopteran family, the Formicidae (ants) (25). However, decline was  
109 consistent across Anthophila families, as most of them showed a steepening decline starting  
110 at the late 1990s/ early 2000's (Fig. 2, lower six rows). These declines in richness of recorded  
111 species ranged from 47% for Halictidae to over 77% for Melittidae. Comparisons between  
112 Anthophila families and two families of apoid wasps sister to bees, and to a more distantly  
113 related family, the true ants (Formicidae) revealed contrasting trends (Fig. 2). While both  
114 wasp families also show declining trends, they present different patterns than bees: record  
115 richness of sphecid and crabronid wasps both show a smoother decrease initiating earlier than  
116 the 2000's. In contrast, ants show very little evidence of global record richness decline, but  
117 rather a trend towards an increase in the number of recorded species that at most decreased  
118 during the last decade. Although the limited number of bee families precludes a formal  
119 analysis of phylogenetic patterning, closely related families (e.g., Apidae and Megachilidae,  
120 or Colletidae and Halictidae) seem to share more similar patterns of record richness in terms  
121 of timing and magnitude than less related families. This hint of phylogenetic patterning

122 becomes even more apparent when considering the two apoid wasp families, Crabronidae and  
123 Sphecidae (Fig. 2). Altogether, family-specific trends and asymptotic richness estimates show  
124 that the overall decline in global bee record richness is not driven by any particular family.  
125 Instead, a generalized decline seems to be a pervasive feature within the bee lineage.

126 Next, we explored the geographic distribution of the dataset, and repeated the analyses at  
127 a continental level. As expected, we find an uneven contribution of each continent to decadal  
128 number of records, most coming from North America and Europe (Fig. S5). North America  
129 (including Central America and the Caribbean) has the largest and most even representation  
130 of records across decades (between 46 and 75% of global records) and shows its steepest  
131 decline in species record richness between the 1990's and the 2000's (Fig. S6). In contrast,  
132 Europe shows two separate periods of decline, one between the 1970's and the 1980's and a  
133 more recent one between the 2000's and 2010's (Fig. S6). Africa shows a sustained fall in  
134 species record richness since the 1990's, whereas in Asia the decline seems to have started  
135 two or three decades earlier (Fig. S6). The trend in South America is less clear, although it  
136 also decreases in the last two decades (Fig. S6). Overall, analyses of the dataset at a  
137 continental scale show heterogeneity in both the proportional and absolute contributions to  
138 the records, and in the timing and magnitude of the decline in record species richness.  
139 However, despite large differences in data availability and, perhaps, except for Oceania,  
140 decline in recorded bee diversity seems to be common to all continents.

141 Global decline in bee record diversity could relate to a proportional decrease in bee  
142 abundance, so that rare species become rarer or even extinct, and abundant species less  
143 abundant. Alternatively, the less abundant species could be declining strongly, whereas  
144 abundant species might be declining at a lower rate or even thriving. These different  
145 scenarios are expected to leave a distinctive signature in the temporal pattern of relative  
146 abundances. Under the first scenario, the sharp decrease in species richness estimates should

147 not be accompanied by a decrease in evenness, a measure of how equally total record  
148 abundance is partitioned among species, whereas under the second scenario there should be a  
149 parallel decrease in record evenness. As expected from the hypothesis of an abundance-  
150 related differential species decline, decadal estimates of Pielou's index, a common measure  
151 of evenness (26), based on bee records decrease strongly since the 1990's (Fig. 3). Therefore,  
152 the decline in richness of species records can relate to a process of thousands of species  
153 becoming too rare to be sampled while fewer species are becoming dominant and perhaps  
154 even increasing in abundance.

155 Our results support the hypothesis of a massive global decline in bee diversity. If trends in  
156 species richness of GBIF records are reflecting an actual trend in bee diversity, then this  
157 decline seems to be occurring with distinctive characteristics in every bee family and in most  
158 continents. Interestingly, such global bee decline appears to be a relatively recent  
159 phenomenon which started in the nineties, at the beginning of the globalization era, and  
160 continues to the present. The globalization era has not only been a period of major economic,  
161 political and social change, but also of accelerated land-use transformation (27). Bees thrive  
162 in heterogeneous habitats, even those driven by man (11, 28), where they find a diversity of  
163 floral and nesting resources. However, land devoted to agriculture, particularly to  
164 monoculture, has expanded in several regions of the world since the 1990s (27). This has led  
165 not only to higher habitat homogeneity, which can relate by itself to more impoverished and  
166 spatially homogeneous bee assemblages (11, 29), but also to higher use of pesticides and  
167 other agriculture chemical inputs that have direct and indirect lethal and sub-lethal effects on  
168 bee health (30). Effects of climate change on shrinking bee geographical ranges have been  
169 also documented in Europe and North America (3). Lastly, a booming international bee trade  
170 has involved the co-introduction of bee pathogens, that may cause bee decline, like the  
171 emblematic case of the giant Patagonian bumble bee, *Bombus dahlbomii* (31). A visual

172 indication of phylogenetic patterning in the trend of recorded species diversity among the  
173 different bee families (Fig. 2) suggests that different lineages can be differentially affected by  
174 different drivers, likely based both on their common geographical distribution and shared  
175 clade-specific biological and ecological traits (32). Two or more of these drivers can act  
176 synergistically, which can have accelerated the process of bee decline we are documenting  
177 here.

178 Associated with the declining trend of richness of species records is a trend of increasing  
179 dominance of records by a few species. Increasing dominance by one or a few species can be  
180 observed at the regional scale, like the case of invasive *Bombus terrestris* in southern South  
181 America (33), or globally, as seen for the western honeybee, *Apis mellifera* (Fig. S7). The  
182 western honeybee has been introduced in every single continent from its original  
183 geographical range in Europe and Africa. Although both domesticated and wild populations  
184 of the western honeybee seem to be declining in several countries, this species is still thriving  
185 globally (34). A consequence of increasingly less diverse and uneven bee assemblages could  
186 be an increase in pollination deficits, causing a reduction in the quantity and quality of the  
187 fruits and seeds produced by both wild and cultivated plants. Less diverse bee assemblages at  
188 both local and regional scales have been associated with lower and less stable yields of most  
189 pollinator-dependent crops (8).

190 GBIF is certainly not a source of systematically collected data, and this might be cause of  
191 concern when interpreting the results of our analyses (35, 36). However, several of its  
192 potential biases would be expected to deflate, rather than inflate our results. For example,  
193 collectors targeting rare species would be expected to enrich the number of species (unless  
194 many species are becoming so scarce that they just cannot be found). Spatial and temporal  
195 biases in collection intensity (e.g., targeted programs might enrich the abundance of specific  
196 species/groups at specific spans and regions) could also generate spurious trends.



197 Nonetheless, our continent-level analysis showed that those regions with the best temporal  
198 and spatial coverage (i.e., Europe and North America) are the ones showing the clearest  
199 signal for decline (Fig. S6). Furthermore, none of those biases can explain the noticeable  
200 phylogenetic contagion seen in the trends (Fig. 2) better than the fact that the hymenopteran  
201 groups we analyzed have a considerable phylogenetic signal in their ecology and life history  
202 traits and would be expected to show phylogenetic clustering in their response to drivers of  
203 decline. Thus, while the inherent heterogeneity and biases of aggregated datasets as GBIF's  
204 make them unreliable as a direct data source of predictive models, they can still be used  
205 within a hypothesis-driven framework to test whether bees as a group are declining  
206 worldwide. In this context, our results are largely confirmatory of the hypothesis that bee  
207 diversity is declining globally.

## 208 Conclusions

209 One of the most important pieces of missing information of the global report on  
210 Pollinators, Pollination and Food Production of IPBES (37) was the lack of data and analysis  
211 on global bee decline, despite the many local and a few regional reports pointing out that this  
212 decline could add to a global phenomenon. Despite all its shortcomings, GBIF is probably the  
213 best global data source available on long-term species occurrence and has the potential to  
214 contribute in filling this critical knowledge gap. Its analysis supports the hypothesis that we  
215 are undergoing a major global collapse in bee diversity that needs the immediate attention of  
216 governments and international institutions. Under the best scenario, this collapse can indicate  
217 that thousands of bee species have become too rare; under the worst scenario, they may have  
218 already gone extinct. In any case, a decline in bee diversity driven by either increasing rarity  
219 or irreversible extinction will have consequences for the pollination of wild plants and crops  
220 and knock on ecological and economic consequences. Slowing down and even reversing

221 habitat destruction and land-conversion to intensive uses, implementation of environmentally  
222 friendly schemes in agricultural and urban settings, and programs to re-flower our world are  
223 urgently required. Bees cannot wait.

## 224 **Methods**

### 225 **Datasets**

226 An initial query at the database of occurrence records at the Global Biodiversity  
227 Information Facility ([www.gbif.org](http://www.gbif.org)) using the filters [Scientific Name = “Hymenoptera”  
228 AND Basis of Record = “Preserved Specimen”] resulted on 7,766,219 total records involving  
229 1,026 datasets, which we call the “base dataset” (16). Data were downloaded as a text file and  
230 filtered for records identified to species levels and belonging to either Anthophila (defined as  
231 the families Melittidae, Andrenidae, Halictidae, Colletidae, Megachilidae and Apidae), two  
232 closely related families of apoid wasps (Crabronidae and Sphecidae), or the true ants  
233 (Formicidae), retaining 3,248,988 records (2,195,968 records belonging to Anthophila).  
234 Phylogenetic relations between all these nine families (six bee, two apoid wasp families, and  
235 one ant family) follow recent phylogenomic results (25).

236 To test potential biasing due to recent decreases in record numbers, we re-queried GBIF  
237 using the filters [Scientific Name = “Hymenoptera” AND Basis of Record = (“Preserved  
238 Specimen” OR “Human observation”)]. This query resulted in 9,508,391 records from 1,977  
239 datasets (19), from which we filtered the families of Anthophila as above, resulting in an  
240 “expanded bee” dataset (2,883,419 records).

### 241 **Analyses**

242 All datasets were analyzed using a customized script written and executed within the R  
243 computing environment (38). The complete annotated script is available as Supplementary

244 Materials, and can be used to fully reproduce all results, or adapted to re-run the analyses on  
245 other datasets.

246 After removing records without “year” data, yearly counts of records and species for all  
247 three datasets were plotted directly using the `plot` function in the base R package. Trend  
248 curves were generated using the `loess` (39) function (`stats` package) with a smoothing  $\alpha$   
249 parameter of 0.2. A “decade” field was calculated from “year”, and records by species and  
250 decade were counted and stored in a matrix of  $m$  species  $\times$  7 decades (1950’s to 2010’s). This  
251 matrix was used as abundance data input for the `iNEXT` function of the `iNEXT` package (18)  
252 to estimate rarefaction-based interpolation/extrapolation (`iNEXT`) curves and Chao1  
253 asymptotic estimators of species richness (17). We also compared the asymptotic estimator  
254 for species richness for each family with the total number of species listed for each family in  
255 the taxonomic framework of the Integrated Taxonomic Information System ([www.itis.gov](http://www.itis.gov)).

256 To estimate potential biases caused by changes of taxonomic expertise over time, we re-  
257 filtered the initial GBIF query without excluding records without a species ID, then counted  
258 the number of records with or without a species id per year. To analyze trends at continental  
259 level, we added a “Continent” field to the base dataset via table joining to a list of countries,  
260 country codes and continents from [https://datahub.io/JohnSnowLabs/country-and-continent-](https://datahub.io/JohnSnowLabs/country-and-continent-codes-list)  
261 [codes-list](https://datahub.io/JohnSnowLabs/country-and-continent-codes-list). We then repeated the analyses splitting the dataset by continent. To show trends in  
262 equitability of species abundance across records over time, we calculated Pielou’s evenness  
263 index (26),  $J = \sum p_i \ln(p_i) / \log(S)$  for  $i=1$  to  $S$ , the total number of species, for each year between  
264 1900 and 2018, using the diversity functions from the package `vegan`(40). To calculate the  
265 percentage contribution of each species to each year’s records, we generated a count table of  
266 records per species (rows) and year (columns) and used the `colPerc` function from the  
267 `tigerstats` package (41). Then, the contribution of a single species (e.g., *Apis mellifera*)

268 was plotted as a function of year; an exponential curve was fit to the points of the plot using  
269 the `lm` function from the R base `stats` package.

## 270 Acknowledgments

271 We thank Lawrence Harder, Lucas Garibaldi and Gherardo Bogo for feedback on our  
272 ideas and during the writing of this manuscript, and to the GBIF Secretariat for maintaining  
273 this great resource. This project was inspired by work done at the Safeguarding Pollination  
274 Services in a Changing World (SURPASS) workshops that took place at Puerto Blest,  
275 Bariloche, Río Negro, Argentina in 2018 and Seaton, Devonshire, UK in 2019, supported by  
276 the Researcher Links Workshop grant, ID 2017-RLWK9- 359543120, under the UK LATAM  
277 partnership funded by the UK Department of Business, Energy and Industrial Strategy  
278 (BEIS) and Argentina's CONICET, and delivered by the British Council.

## 279 Footnotes

280 **Author contributions:** Conceptualization, E.E.Z. and M.A.A.; Data Curation: E.E.Z.;  
281 Formal analysis: E.E.Z. and M.A.A.; Visualization: E.E.A.; Writing – original draft, E.E.A.  
282 and M.A.A., Writing – review & editing, E.E.Z. and M.A.A.

283 **Competing interests:** Authors declare no competing interests.

284 **Data and materials availability:** Occurrence record data used in this paper can be  
285 downloaded from <https://doi.org/10.15468/dl.h52qyh> and <https://doi.org/10.15468/dl.o73fzx>;  
286 original sources traced via GBIF.org. The R language script used to analyze the data and  
287 generate the plots is available as Supplementary Materials.

## 288 References

289 1. R. Dirzo, *et al.*, Defaunation in the Anthropocene. *Science* **345**, 401–406 (2014).

- 290 2. C. A. Hallmann, *et al.*, More than 75 percent decline over 27 years in total flying insect  
291 biomass in protected areas. *PLOS ONE* **12**, e0185809 (2017).
- 292 3. F. Sánchez-Bayo, K. A. G. Wyckhuys, Worldwide decline of the entomofauna: A  
293 review of its drivers. *Biol. Conserv.* **232**, 8–27 (2019).
- 294 4. IPBES, *Summary for policymakers of the global assessment report on biodiversity and*  
295 *ecosystem services of the Intergovernmental Science-Policy Platform on Biodiversity*  
296 *and Ecosystem Services*, S. Díaz, *et al.*, Eds. (IPBES secretariat, 2019) (August 15,  
297 2019).
- 298 5. C. D. Michener, *The Bees of the World*, 2nd Ed. (The Johns Hopkins University Press,  
299 2007).
- 300 6. S. G. Potts, *et al.*, Global pollinator declines: trends, impacts and drivers. *Trends Ecol.*  
301 *Evol.* **25**, 345–353 (2010).
- 302 7. J. Ollerton, R. Winfree, S. Tarrant, How many flowering plants are pollinated by  
303 animals? *Oikos* **120**, 321–326 (2011).
- 304 8. L. A. Garibaldi, *et al.*, Wild Pollinators Enhance Fruit Set of Crops Regardless of Honey  
305 Bee Abundance. *Science* **339**, 1608–1611 (2013).
- 306 9. J. C. Biesmeijer, *et al.*, Parallel Declines in Pollinators and Insect-Pollinated Plants in  
307 Britain and the Netherlands. *Science* **313**, 351–354 (2006).
- 308 10. D. Goulson, G. C. Lye, B. Darvill, Decline and Conservation of Bumble Bees. *Annu.*  
309 *Rev. Entomol.* **53**, 191–208 (2008).
- 310 11. N. M. Williams, C. Kremen, Resource Distributions Among Habitats Determine  
311 Solitary Bee Offspring Production in a Mosaic Landscape. *Ecol. Appl.* **17**, 910–921  
312 (2007).
- 313 12. J. Belsky, N. K. Joshi, Impact of Biotic and Abiotic Stressors on Managed and Feral  
314 Bees. *Insects* **10**, 233 (2019).
- 315 13. M. A. Aizen, *et al.*, Global agricultural productivity is threatened by increasing  
316 pollinator dependence without a parallel increase in crop diversification. *Glob. Change*  
317 *Biol.* **25**, 3516–3527 (2019).
- 318 14. C. D. Thomas, T. H. Jones, S. E. Hartley, “Insectageddon”: A call for more robust data  
319 and rigorous analyses. *Glob. Change Biol.* **25**, 1891–1892 (2019).
- 320 15. GBIF Secretariat, What is GBIF? (2019) (August 15, 2019).
- 321 16. GBIF.org, (25 June 2019) GBIF Occurrence Download.  
322 <https://doi.org/10.15468/dl.h52qyh> (September 12, 2019).
- 323 17. A. Chao, *et al.*, Rarefaction and extrapolation with Hill numbers: a framework for  
324 sampling and estimation in species diversity studies. *Ecol. Monogr.* **84**, 45–67 (2014).

- 325 18. T. C. Hsieh, K. H. Ma, A. Chao, iNEXT: an R package for rarefaction and extrapolation  
326 of species diversity (Hill numbers). *Methods Ecol. Evol.* **7**, 1451–1456 (2016).
- 327 19. GBIF.org, (11 April 2019) GBIF Occurrence Download.  
328 <https://doi.org/10.15468/dl.o73fzx> (September 12, 2019).
- 329 20. M. M. Gardiner, *et al.*, Lessons from lady beetles: accuracy of monitoring data from US  
330 and UK citizen-science programs. *Front. Ecol. Environ.* **10**, 471–476 (2012).
- 331 21. M. Kosmala, A. Wiggins, A. Swanson, B. Simmons, Assessing data quality in citizen  
332 science. *Front. Ecol. Environ.* **14**, 551–560 (2016).
- 333 22. E. O. Wilson, The Plight of Taxonomy. *Ecology* (1971) <https://doi.org/10.2307/1936022>  
334 (August 20, 2019).
- 335 23. I. Agnarsson, M. Kuntner, Taxonomy in a Changing World: Seeking Solutions for a  
336 Science in Crisis. *Syst. Biol.* **56**, 531–539 (2007).
- 337 24. M. R. de Carvalho, *et al.*, Does counting species count as taxonomy? On  
338 misrepresenting systematics, yet again. *Cladistics* **30**, 322–329 (2014).
- 339 25. B. R. Johnson, *et al.*, Phylogenomics Resolves Evolutionary Relationships among Ants,  
340 Bees, and Wasps. *Curr. Biol.* **23**, 2058–2062 (2013).
- 341 26. E. C. Pielou, *An introduction to mathematical ecology* (Wiley-Interscience, 1969).
- 342 27. E. F. Lambin, P. Meyfroidt, Global land use change, economic globalization, and the  
343 looming land scarcity. *Proc. Natl. Acad. Sci. U. S. A.* **108**, 3465–3472 (2011).
- 344 28. É. Normandin, N. J. Vereecken, C. M. Buddle, V. Fournier, Taxonomic and functional  
345 trait diversity of wild bees in different urban settings. *PeerJ* **5**, e3051 (2017).
- 346 29. C. Quintero, C. L. Morales, M. A. Aizen, Effects of anthropogenic habitat disturbance  
347 on local pollinator diversity and species turnover across a precipitation gradient.  
348 *Biodivers. Conserv.* **19**, 257–274 (2010).
- 349 30. D. Goulson, E. Nicholls, C. Botías, E. L. Rotheray, Bee declines driven by combined  
350 stress from parasites, pesticides, and lack of flowers. *Science* **347**, 1255957 (2015).
- 351 31. M. A. Aizen, *et al.*, Coordinated species importation policies are needed to reduce  
352 serious invasions globally: The case of alien bumblebees in South America. *J. Appl.*  
353 *Ecol.* **56**, 100–106 (2019).
- 354 32. A. De Palma, *et al.*, Predicting bee community responses to land-use changes: Effects of  
355 geographic and taxonomic biases. *Sci. Rep.* **6**, 31153 (2016).
- 356 33. B. Geslin, C. L. Morales, New records reveal rapid geographic expansion of *Bombus*  
357 *terrestris* Linnaeus, 1758 (Hymenoptera: Apidae), an invasive species in Argentina.  
358 *Check List* **11**, 1620 (2015).
- 359 34. M. A. Aizen, L. D. Harder, The Global Stock of Domesticated Honey Bees Is Growing  
360 Slower Than Agricultural Demand for Pollination. *Curr. Biol.* **19**, 915–918 (2009).

- 361 35. E. García-Roselló, *et al.*, Can we derive macroecological patterns from primary Global  
362 Biodiversity Information Facility data? *Glob. Ecol. Biogeogr.* **24**, 335–347 (2015).
- 363 36. J. Troudet, P. Grandcolas, A. Blin, R. Vignes-Lebbe, F. Legendre, Taxonomic bias in  
364 biodiversity data and societal preferences. *Sci. Rep.* **7**, 9132 (2017).
- 365 37. S. G. Potts, *et al.*, “The assessment report of the Intergovernmental Science-Policy  
366 Platform on Biodiversity and Ecosystem Services on pollinators, pollination and food  
367 production” (Secretariat of the Intergovernmental Science-Policy Platform on  
368 Biodiversity and Ecosystem Services, 2016).
- 369 38. R Development Core Team, *R: A Language and Environment for Statistical Computing*  
370 (2011).
- 371 39. W. S. Cleveland, E. Grosse, W. M. Shyu, “Local regression models” in *Statistical*  
372 *Models in S*, J. M. Chambers, T. J. Hastie, Eds. (Wadsworth & Brooks/Cole, 1992), pp.  
373 309–376.
- 374 40. J. Oksanen, *et al.*, *vegan: Community Ecology Package* (2019).
- 375 41. R. Robinson, H. White, *tigerstats: R Functions for Elementary Statistics* (2016).
- 376
- 377

378 **Figures and figure legends**

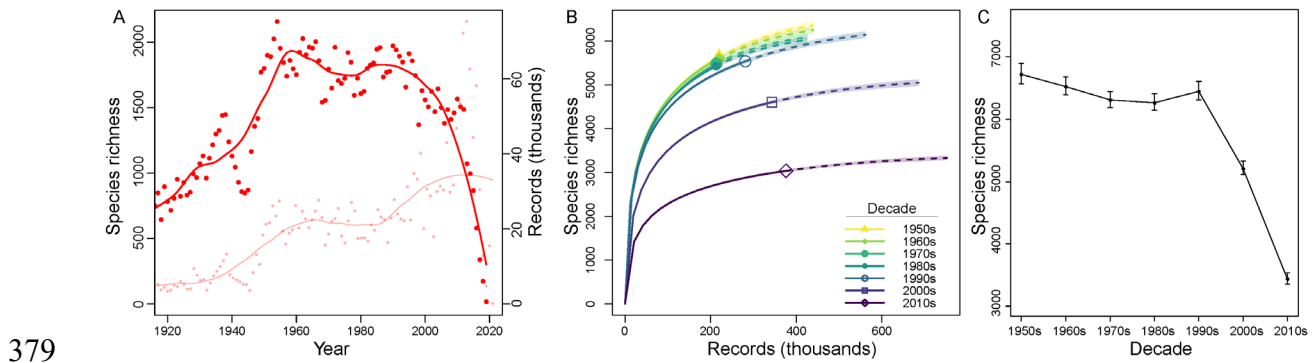

**Fig. 1.** Despite increasing number of specimen records, the number of worldwide recorded bee species is sharply decreasing. (A) Number of species (bold dots and line, left axis) and specimens (light dots and line, right axis) of worldwide Anthophila (bees) GBIF records of preserved specimens. (B) Chao's interpolation/extrapolation (iNEXT) curves based on worldwide Anthophila (bees) GBIF records of preserved specimens. Data were grouped by decade for the period 1950-2019. The symbols show actual number of specimen records and separate interpolated (left, full line) from extrapolated (right, dashed line) regions of each curve. (C) Values of the asymptotic richness estimator by decade (error bars mark upper and lower 95% confidence intervals).



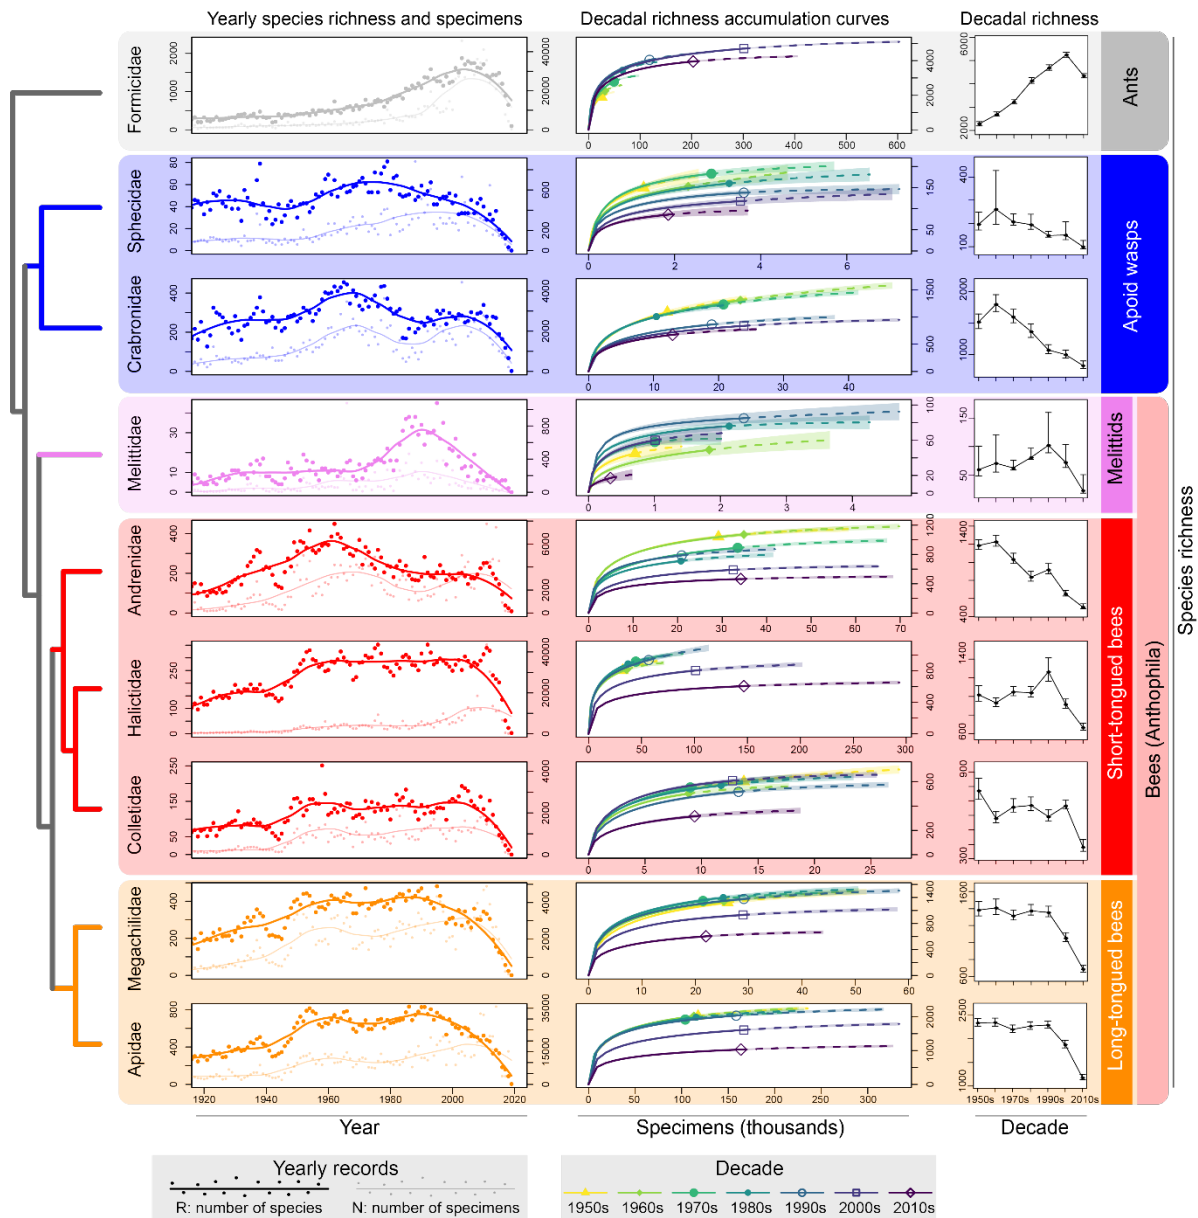

390

391 **Fig. 2.** Decline patterns in worldwide records of bees are generalized but phylogenetically  
 392 structured. Phylogenetic relationships among each of the six families of bees (Anthophila,  
 393 lower six rows), two related families of non-flower associated apoid wasps (2nd and 3rd  
 394 rows), and the less related, highly specious ant family (top row). Plots on the left row show  
 395 number of species (bold dots and line, left axis) and specimens (light dots and line, right axis)  
 396 in GBIF records; plots on the middle row shows Chao's interpolation/extrapolation curves  
 397 based on GBIF records, grouped by decade for the period 1950-2019; plots on the right row

398 show asymptotic estimates of richness by decade for the same period (error bars mark upper  
399 and lower 95% confidence intervals).

400

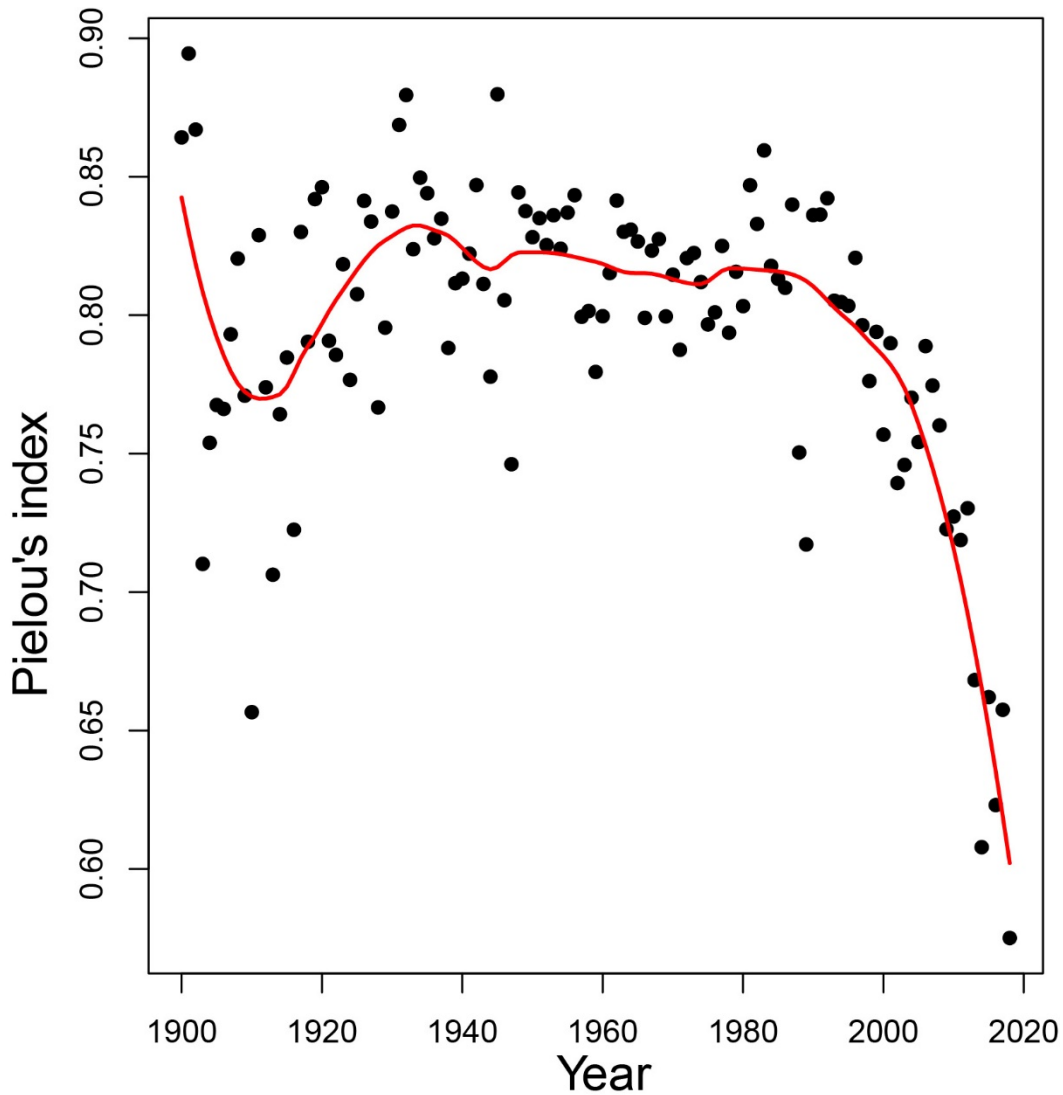

401

402 **Fig. 3.** Overall representation of worldwide bee species on global records is becoming  
403 increasingly uneven over time. Estimate of Pielou's index of sample evenness per year since  
404 the year 1900 for worldwide preserved bee specimen records found the GBIF database.

405 Points represent yearly values; the red curve shows a loess smoothed trend line.

406

407
